# Supplementary material
Source: ML conference proceedings conference paper supplement (https://openreview.net/forum?id=hJBPMSUNUG)
Supplement: supplementary_material [file attachment]

## A SUMMARY OF NOTATIONS

This section provides a summary of the important notations and variables that are frequently used throughout the paper in Table S2.

Table S2: Summary of important notations

| Notation                            | Description                                                                                            |
|-------------------------------------|--------------------------------------------------------------------------------------------------------|
| <b>General Indices</b>              |                                                                                                        |
| pre, post                           | Indices denoting presynaptic and postsynaptic quantities, respectively.                                |
| $(m_{\text{pre}}, m_{\text{post}})$ | A pair of presynaptic and postsynaptic neuronal types uniquely identifies a certain synapse type.      |
| <b>Plasticity Signals</b>           |                                                                                                        |
| $S$                                 | Binary indicator for spike occurrence (e.g., $S_{\text{pre}}, S_{\text{post}}$ ).                      |
| $X$                                 | Eligibility trace capturing the history of neural activity (e.g., $X_{\text{pre}}, X_{\text{post}}$ ). |
| $R$                                 | Reward prediction error trace encoding neuromodulatory signals.                                        |
| <b>Plasticity Parameters</b>        |                                                                                                        |
| $c$                                 | Learnable coefficient for a specific plasticity term (e.g., $c^k$ ).                                   |
| $\tau_E^m$                          | Time constant for the eligibility trace of neuron type $m$ .                                           |
| $\tau_R^m$                          | Time constant for the reward trace of neuron type $m$ .                                                |
| $\mathcal{P}$                       | Set of candidate plasticity terms derived from Taylor expansion.                                       |
| $\Delta W$                          | Synaptic weight update value (plasticity rule).                                                        |
| <b>Network &amp; Neuron Model</b>   |                                                                                                        |
| $W_{\text{LGN}}$                    | Fixed synaptic weights from the LGN model to the V1 model.                                             |
| $\tau_{\text{syn}}$                 | Synaptic time constant governing current decay.                                                        |

## B RELATED WORK

### B.1 MODELING PLASTICITY MECHANISM

Explaining the synaptic plasticity mechanism via mathematical formulation has been a main theme in computational neuroscience. Initial theoretical frameworks for synaptic plasticity, including BCM theory (Bienenstock et al., 1982) and Oja’s rule (Oja, 1982), were largely based on Hebbian assumptions (Hebb, 1949). Later experimental evidence revealed that the precise timing of spikes is crucial for synaptic plasticity (Bi & Poo, 1998; Zhang et al., 1998; Debanne et al., 1998; Woodin et al., 2003). This led to the development of a rich body of spike timing-dependent plasticity (STDP) models (Song et al., 2000; Kempter et al., 1999; Pfister & Gerstner, 2006; Clopath et al., 2010). More recently, spike timing-based plasticity models have established connections with network properties, as well as network learning and memory characteristics, offering an integrated view of how synaptic plasticity shapes neural computation (Zenke et al., 2015; Illing et al., 2021; Payeur et al., 2021; Eckmann et al., 2024; Brito & Gerstner, 2024; Agnes & Vogels, 2024).

Despite remarkable progress in understanding individual synaptic plasticity mechanisms in isolation, experimental studies suggest that multiple types of synaptic plasticity often operate synergistically (D’amour & Froemke, 2015; El-Boustani et al., 2018). These processes commonly involve various neuromodulators (Seol et al., 2007; Huang et al., 2013; McFarlan et al., 2023; Park et al., 2025), which collectively shape network dynamics and functional behavior. However, technical limitations inherent to large-scale in vivo experiments have hindered a comprehensive understanding of how these heterogeneous synaptic plasticity mechanisms interact.

### B.2 INFERRING PLASTICITY MECHANISM

In addition to modeling plasticity rules, an alternative approach to understanding plasticity mechanisms involves inferring their mathematical formulations directly from neural or behavioral data using data-driven methods. Predicting plasticity rules from spike train data, in particular, represents an intuitive and powerful means of uncovering the underlying synaptic mechanisms (Stevenson & Koording, 2011; Linderman et al., 2014; Robinson et al., 2016; Ghanbari et al., 2017; Wei & Stevenson, 2021; Mehta et al., 2024). Previous studies have also derived synaptic plasticity rules by examining changes in neuronal firing distributions observed before and after learning (Lim et al., 2015; Chen et al., 2023). Alternatively, some studies explore plasticity mechanisms by identifying how synaptic modifications enable networks to achieve desired network dynamics and computational functions (Confavreux et al., 2020; 2023). Complementarily, another class of studies optimizes synaptic rules to endow networks with the capability for successful cognitive task performance or behavioral data fitting (Najarro & Risi, 2020; Ashwood et al., 2020; Jordan et al., 2021; Tyulmankov et al., 2022; Shervani-Tabar & Rosenbaum, 2023; Miconi, 2023; Mehta et al., 2024; Confavreux et al., 2025a;b).

Although some of the aforementioned studies have employed evolutionary methods or meta-learning frameworks to explore plasticity mechanisms (Najarro & Risi, 2020; Jordan et al., 2021; Tyulmankov et al., 2022; Confavreux et al., 2023; Miconi, 2023; Shervani-Tabar & Rosenbaum, 2023; Confavreux et al., 2025a), these approaches suffer from several limitations. First, they have largely been restricted to small artificial networks or simplified biological models, which may limit their ability to incorporate biological constraints and capture the full complexity of biological systems. Second, most current methods are restricted to a small, manually defined space of plasticity rules, typically spanning from a uniform rule applied across all synapses to limited forms of heterogeneity that distinguish only between excitatory and inhibitory synapses. Third, prior studies have primarily been limited to single-task settings or have considered only a single biological objective. These limitations hinder comprehensive exploration of the broader landscape of heterogeneous plasticity rules, as well as the systematic identification of synaptic plasticity mechanisms that are both biologically plausible and functionally relevant.

## C MODEL CONSTRUCTIONS OF LGN AND V1

Our computational framework employs a hierarchical visual processing architecture comprising a fixed LGN preprocessing stage and an adaptive V1 cortical network. Specifically, the LGN model transforms visual stimuli through 17,400 spatiotemporal filters, while the V1 network, built on experimentally validated Allen Brain Atlas parameters (Billeh et al., 2020), serves as the substrate for plasticity rule discovery across 17 distinct cell types and cortical layers.

### C.1 LGN MODEL AND LGN-TO-V1 MODEL

Visual stimuli undergo preprocessing through an LGN model that qualitatively simulates the computational functions of both retinal and LGN processing stages (Billeh et al., 2020). The model architecture incorporates 17,400 spatiotemporal filters designed to replicate the response characteristics of mouse LGN neurons to visual inputs (Durand et al., 2016). Each filter generates positive-valued outputs representing the firing rates of individual LGN neurons.

The preprocessing pipeline begins with converting visual input pixels to grayscale, followed by normalization to the interval of intensity  $[-\text{Int}, \text{Int}]$  where  $\text{Int} = 2$  in our setting. The processed LGN outputs are subsequently transformed into external current injections for the V1 model through a fixed biological-data-based LGN-to-V1 connection weight. The whole LGN to V1 pathway can be represented as:

$$I_{\text{sti}} = \mathbf{W}_{\text{LGN}} \cdot \text{LGN}(G_{\text{Int}}). \quad (9)$$

where  $G_{\text{Int}}$  denotes the intensity-normalized image inputs within the range  $[-2, 2]$  following the settings in Chen et al. (2022). Note that the LGN model  $\text{LGN}(\cdot)$  and LGN-to-V1 model  $\mathbf{W}_{\text{LGN}}$  remain fixed during the whole optimization process, as we only focus on the plasticity within the V1 model.

### C.2 V1 MODEL

**Neuron models.** Our computational framework builds upon the point-neuron implementation of the biologically realistic V1 model developed by Billeh et al. (2020). To ensure compatibility with plasticity learning rules, we substituted the discrete membrane potential reset mechanism following spike generation with a continuous voltage reduction term  $z_j(t)(v_{th} - E_L)$ , where the spike indicator  $z_j(t) = 1$  during firing events of neuron  $j$  at time  $t$ , and  $z_j(t) = 0$  otherwise. Here,  $v_{th}$  represents the spiking threshold and  $E_L$  denotes the resting membrane potential. This modification preserves the essential neural dynamics while enabling synaptic plasticity rule-based weight updates.

The temporal evolution of the spiking model follows the modified GLIF<sub>3</sub> model (Teeter et al., 2018), which can be represented as:

$$v_j(t + \Delta t) = \beta v_j(t) - z_j(t)(v_{th} - E_L) + \frac{1 - \beta}{C} \left( I_j^e(t + 1) + \sum_m I_j^m(t + 1) + gE_L + I_j^{syn}(t) \right) \quad (10)$$

$$z_j(t) = H(v_j(t) - v_{th}) \quad (11)$$

$$I_j^e(t) = \sum_i W_{\text{LGN}}^{i,j} \text{LGN}(G_{\text{Int}})_i(t) \quad (12)$$

where  $C$  represents neuron capacitance,  $I_j^e$  denotes external current input,  $I_j^m$  refers to the post-spike current,  $I_j^{syn}$  represents synaptic current,  $g$  specifies membrane conductance, and  $v_{th}$  indicates the spiking threshold. The LGN-to-V1 connectivity is mediated by the weight matrix  $\mathbf{W}_{LGN}$ . The decay factor  $\beta = e^{-\Delta t/\tau}$  incorporates the membrane time constant  $\tau$ , while  $\Delta t = 1$  ms defines the resolution of the simulation time step. The Heaviside step function  $H(\cdot)$  governs spike generation dynamics.

To model the neuronal refractory period, we implemented a simplified mechanism where  $z_j(t)$  remains fixed at 0 following each spike for a brief refractory period determined by neuron type. Postsynaptic spike current dynamics are governed by:

$$I^m(t + \Delta t) = f^m I^m(t) + z(t) \Delta I^m; \quad m = 1, \dots, N_{asc} \quad (13)$$

where the multiplicative decay constant  $f^m = \exp(-k^m \Delta t)$  and additive term  $\Delta I^m$  characterize the after-spike current properties. Our implementation supports  $m = 1$  or  $2$  current types. Biophysical parameters are derived from experimental measurements of 111 neurons in the Allen Brain Atlas database (Durand et al., 2016; Billeh et al., 2020), encompassing neuron capacitance  $C$ , conductance  $g$ , resting potential  $E_L$ , refractory period duration, and the amplitudes  $\Delta I^m$  and decay constants  $k^m$  for both after-spike current types.

**Synaptic connectivity and dynamics.** The V1 network architecture incorporates experimentally-derived connectivity patterns that define probabilistic synaptic connections between neuron populations. Connection probabilities for all pairwise combinations among the 17 characterized cell classes are specified according to experimental measurements (Billeh et al., 2020), with data organized in a comprehensive connectivity matrix. Grid entries indicating unknown values represent uncharacterized connection types in the experimental dataset.

The baseline connection probabilities reflect measured synaptic contact frequencies for neuron pairs positioned within  $75\text{-}\mu\text{m}$  horizontal intersomatic distances. To incorporate spatial connectivity constraints, these probabilities are modulated by an exponentially decaying factor that scales with horizontal distance between neuronal somata following Chen et al. (2022) Fig.1D. This distance-dependent scaling preserves the statistical properties observed in experimental connectivity data while accounting for spatial organization principles in cortical circuits.

Synaptic transmission delays are distributed uniformly within the interval  $[1,4]$  ms, derived from experimental measurements presented in Fig. 4E of Billeh et al. (2020) and discretized to match the 1 ms integration time step. The postsynaptic current dynamics for neuron  $j$  follows first-order kinetics:

$$I_j^{syn}(t + \Delta t) = e^{-\frac{\Delta t}{\tau_{syn}}} I_j^{syn}(t) + \Delta t \cdot e^{-\frac{\Delta t}{\tau_{syn}}} C_j^{rise}(t), \quad (14)$$

$$C_j^{rise}(t + \Delta t) = e^{-\frac{\Delta t}{\tau_{syn}}} C_j^{rise}(t) + \sum_i W_{V1}^{i,j} z_i(t) \frac{1}{\tau_{syn}}, \quad (15)$$

where  $\tau_{syn}$  represents the synaptic time constant,  $W_{V1}^{i,j}$  denotes the recurrent connection weight from presynaptic neuron  $i$  to postsynaptic neuron  $j$  within V1, and  $z_i(t)$  indicates spike occurrence in the presynaptic neuron. The synaptic time constants  $\tau_{syn}$  are cell-type specific, reflecting the diverse kinetic properties of synaptic transmission between different neuronal populations as characterized in Billeh et al. (2020).

**Network initialization.** All state variables, including spike indicators and membrane potentials, are initialized to zero at simulation onset. The initial configurations of both feedforward weights  $\mathbf{W}_{LGN}$  and recurrent connectivity weights  $\mathbf{W}_{V1}$  are established according to the empirical values reported in Billeh et al. (2020), providing a biologically realistic starting point for network dynamics and subsequent plasticity-driven modifications.

## D DETAILS ABOUT PLASTICITY RULES AND WEIGHT UPDATES

### D.1 PLASTICITY RULE CANDIDATES TERMS

Here we present all the possible plasticity rule terms that may exist in Eq. 7 in the main manuscript. Each plasticity rule candidate is governed by a binary selection indicator  $g$  and a learnable coefficient  $c$ . This term set includes the *first-order terms*:

$$g^1 \cdot c^1 \cdot S_{\text{pre}}, g^2 \cdot c^2 \cdot S_{\text{post}}, g^3 \cdot c^3 \cdot X_{\text{pre}}, g^4 \cdot c^4 \cdot X_{\text{post}}, g^5 \cdot c^5 \cdot R;$$

the *second-order terms*:

$$\begin{aligned} &g^6 \cdot c^6 \cdot S_{\text{pre}} \cdot S_{\text{post}}, g^7 \cdot c^7 \cdot S_{\text{pre}} \cdot X_{\text{pre}}, g^8 \cdot c^8 \cdot S_{\text{pre}} \cdot X_{\text{post}}, g^9 \cdot c^9 \cdot S_{\text{pre}} \cdot R, \\ &g^{10} \cdot c^{10} \cdot S_{\text{post}} \cdot X_{\text{pre}}, g^{11} \cdot c^{11} \cdot S_{\text{post}} \cdot X_{\text{post}}, g^{12} \cdot c^{12} \cdot S_{\text{post}} \cdot R, \\ &g^{13} \cdot c^{13} \cdot X_{\text{pre}}^2, g^{14} \cdot c^{14} \cdot X_{\text{pre}} \cdot X_{\text{post}}, g^{15} \cdot c^{15} \cdot X_{\text{pre}} \cdot R, g^{16} \cdot c^{16} \cdot X_{\text{post}}^2, \\ &g^{17} \cdot c^{17} \cdot X_{\text{post}} \cdot R; \end{aligned}$$

and the *third-order terms*:

$$\begin{aligned} &g^{18} \cdot c^{18} \cdot X_{\text{pre}} \cdot S_{\text{post}} \cdot R, g^{19} \cdot c^{19} \cdot S_{\text{pre}} \cdot X_{\text{post}} \cdot R, g^{20} \cdot c^{20} \cdot X_{\text{pre}}^2 \cdot R, \\ &g^{21} \cdot c^{21} \cdot X_{\text{post}}^2 \cdot R, g^{22} \cdot c^{22} \cdot S_{\text{pre}} \cdot S_{\text{post}} \cdot R, g^{23} \cdot c^{23} \cdot X_{\text{pre}} \cdot X_{\text{post}} \cdot R, \\ &g^{24} \cdot c^{24} \cdot S_{\text{post}} \cdot X_{\text{post}} \cdot R, g^{25} \cdot c^{25} \cdot S_{\text{pre}} \cdot X_{\text{pre}} \cdot R, \end{aligned}$$

where  $g$  serves as a binary indicator, and  $c$  denotes the coefficient for candidate. Among the 25 candidate plasticity terms presented above, 16 terms depend only on neuron types, 8 terms are synapse-type specific, and 1 term represents the global reward prediction error. Two additional decay factors govern the neuron-type-dependent eligibility trace and reward prediction error trace.

**Optimizable parameter analysis.** The total number of optimizable parameters for each of the plasticity rules in our framework can be decomposed as follows:

$$n_{\text{optimizable}} = 18 \times n_{\text{neuron types}} + 8 \times n_{\text{synapse type}} + n_{\text{gate}} + 2. \quad (16)$$

For our V1 model implementation following [Billeh et al. \(2020\)](#), which contains 17 distinct neuron types and thus  $17^2 = 289$  possible synapse types, combined with our 25 candidate plasticity terms, the total number of optimizable parameters becomes:

$$n_{\text{optimizable}} = 18 \times 17 + 8 \times 17^2 + 25 + 2 = 2645. \quad (17)$$

This formulation accounts for several parameter categories:

- **Neuron type specific coefficients.** The first term ( $18 \times n_{\text{neuron types}}$ ) corresponds to 16 plasticity rule coefficients that depend only on either presynaptic or postsynaptic neuron type, encompassing most first-, second-, and third-order terms as well as the 2 neuron-type-dependent decay factors.
- **Synapse type specific coefficients.** The second term ( $8 \times n_{\text{synapse type}}$ ) represents coefficients that depend on synapse types (*i.e.*, both presynaptic and postsynaptic neuron types).
- **Binary selection gates.** The term  $n_{\text{gate}}$  represents the number of binary indicators  $g$  for each candidate term in the plasticity rule set.

- **Additional parameters.** The constant term 2 accounts for: (i) the global coefficient for the reward prediction signal  $R$  in first-order terms, which is shared across all synaptic types; and (ii) the task-shared learnable readout threshold  $\varphi$  used in the decision-making process.

Note that among the first-order terms, the reward prediction signal  $R$  has only a single coefficient and gate parameter that can be optimized globally, rather than being specific to individual synaptic connections, reflecting its role as a neuronal population-level learning signal.

## D.2 WEIGHT UPDATE CONSTRAINTS

We enforce Dale’s law (Strata et al., 1999) during plasticity rule based weight updates to maintain biological plausibility and numerical stability. Dale’s law, which requires neurons to release identical neurotransmitters across all synapses, ensures that synaptic polarity remains invariant throughout network optimization. Moreover, due to physical constraints in biological synapses, we consider the synapse type-specific thresholds to prevent weights from becoming excessively large, which can be treated as hard bounds during the network optimization (Gerstner et al., 2014). We set these bounds at 1.5 times the maximum biological values (Billeh et al., 2020) for each synapse type. We also implement an adaptive scaling mechanism to prevent excessive weight changes that could destabilize network dynamics. The weight updates are constrained by a threshold proportional to the current weight magnitude, where the proportion is set to 0.01. This approach ensures that weight modifications remain proportional to existing connection strengths, preventing dramatic changes that could disrupt established connectivity patterns.

## E EXPERIMENTAL DETAILS

### E.1 DETAILED IMPLEMENTATION OF THE EVALUATION METRICS

1. **Cross-domain task performance**, measured by cross-domain task average accuracy, assesses whether the plasticity rule generalizes across different stimulus types rather than specializing to a particular type. In this work, we measure it as the average validation accuracy from independent training sessions using two distinct input domains (grating images and natural images). The accuracy is computed as the proportion of correct responses, including hits during change trials and correct rejections during no-change trials.
2. **Rule complexity** assesses the number of terms within each plasticity rule, with preference given to simple formulations when comparable performance is achieved. In our implementation, we quantify rule complexity by counting the number of active terms in the plasticity rule, determined by the binary selection indicators  $g$  of Eq. (7).
3. **Maximum firing rate** monitors peak neuronal firing rates during the cognitive task after the plasticity rule optimization has been done, with rules maintaining firing rates below 30 Hz considered biologically optimal (Niell & Stryker, 2008). In our implementation, we record the maximum firing rate across all neurons in the network during the validation phases.
4. **Asynchronous firing proportion** evaluates population-level synchronous firing, requiring that simultaneously active neurons constitute less than 1% of the total population at any time point (Lennie, 2003). In our implementation, we calculate the proportion of neurons firing simultaneously at each time step during the validation phase, and identify the maximum proportion.
5. **Firing rate difference** measures the discrepancy between the network’s population firing dynamics during cognitive tasks, after the plasticity rule optimization has been done, and the mean firing rate data observed in mice performing analogous cognitive tasks (Siegle et al., 2021; de Vries et al., 2023). In our implementation, we compute the absolute difference between the average firing rate of the network during validation phase and the experimentally recorded mean firing rate from mice.
6. **Firing rate distribution difference** quantifies the distributional differences between the network’s population firing dynamics during cognitive tasks, after the plasticity rule optimization has been done, and the firing rate distributions recorded from mice performing analogous cognitive tasks (Siegle et al., 2021; de Vries et al., 2023). In our implementation, we compute the Wasserstein distance between the normalized firing rate distributions of the network during validation phase and the experimentally recorded firing rate distributions from mice.

### E.2 CROSS-DOMAIN TASK SETTING

The original behavioral protocol (Siegle et al., 2021; de Vries et al., 2023) required mice to perform sequential discrimination on static natural images or grating images (250 ms presentation duration) interspersed with inter-stimulus grey screen intervals (500 ms), determining whether consecutive stimuli are identical or different. To enable large-scale population search, we implemented 60 ms stimulus presentations and 90 ms inter-stimulus grey intervals (Fig. 3b). Each trial sequence initiated with a 30 ms pre-stimulus delay. Network responses are evaluated within a 30 ms response window beginning 60 ms post-stimulus onset.

### E.3 SEARCH SPACE SETTING

The search spaces of different parameters in each of the plasticity rules are set as follows: Coefficient of plasticity candidate  $c \in [-1, 1]$ , binary selection indicator  $\mathbf{g} \in \{0, 1\}$ , decay factor of eligibility trace

Table S3: Statistics of 3,000 randomly sampled solutions across six objectives.

| Metric                                                      | Mean   | Std    | Median | Best  | Worst  |
|-------------------------------------------------------------|--------|--------|--------|-------|--------|
| Obj 1: Cross-domain task performance ( $\uparrow$ )         | 0.503  | 0.016  | 0.500  | 0.685 | 0.440  |
| Obj 2: Rule complexity ( $\downarrow$ )                     | 0.501  | 0.097  | 0.520  | 0.200 | 0.840  |
| Obj 3: Maximum firing rate ( $\downarrow$ )                 | 437.21 | 122.96 | 500.00 | 99.33 | 500.00 |
| Obj 4: Asynchronous firing proportion ( $\downarrow$ )      | 0.754  | 0.408  | 1.000  | 0.000 | 1.000  |
| Obj 5: Firing rate difference ( $\downarrow$ )              | 139.13 | 93.66  | 144.87 | 0.62  | 271.71 |
| Obj 6: Firing rate distribution difference ( $\downarrow$ ) | 0.612  | 0.201  | 0.610  | 0.144 | 1.253  |

$\tau_E \in (0, 150]$ , and decay factor of reward prediction error  $\tau_R \in (0, 150]$ . The task-shared learnable readout threshold  $\varphi \in [0, 10]$  Hz, following mouse cortical pyramidal neuron firing rates where most neurons fire below 10 Hz (Buzsáki & Mizuseki, 2014).

To gauge the complexity of this search space, we conducted a preliminary analysis by evaluating 3,000 randomly sampled solutions from the defined search space. The statistical distribution of the six objectives is summarized in Table S3. The results demonstrate that the search space is highly non-trivial. Judging by the mean and median values, the vast majority of randomly sampled plasticity rules fail the task. While the best-observed values (Maximum for task performance, minimum for constraints) indicate that high-performing candidates exist within the theoretical bounds, these statistics are computed independently for each objective. Notably, a solution that achieves a good score on one metric (e.g., good accuracy) may perform poorly on others (e.g., extremely high firing rate).

Our evolution framework and model implementation are built on Jax (Bradbury et al., 2018). All the experiments were conducted on  $8 \times$  A6000 GPUs. The simulations were conducted with 1 ms temporal resolution.

#### E.4 BEHAVIOR DATA ESTIMATION FOR VISUAL CHANGE DETECTION

The behavioral accuracy of visual change detection on *natural images* is estimated from Fig. 11 of Garrett et al. (2020) when familiar images were presented to mice. The behavioral accuracy of visual change detection on *grating images* is estimated from Fig. 3A of Glickfeld et al. (2013) when the orientation difference was 5 degrees.

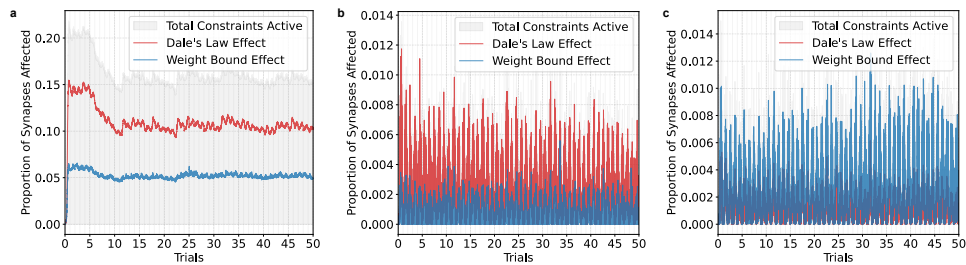

Figure S8: Analysis of constraint enforcement dynamics for the three selected rule sets from Fig. 6. The rules were evaluated over 50 training trials; the curves show the proportion of synapses triggering Dale’s Law or hitting the maximum weight bound at each timestep. **a.** Overall best-performing rule (form:  $\Delta w = X_{\text{post}} + S_{\text{pre}} \cdot X_{\text{pre}} + S_{\text{post}} \cdot X_{\text{pre}} + X_{\text{post}}^2 + X_{\text{post}} \cdot R$ ). **b.** Best rank 1 rule (form:  $\Delta w = S_{\text{pre}}$ ). **c.** Best rank 2 rule. (form:  $\Delta w = S_{\text{pre}} + S_{\text{pre}} \cdot X_{\text{post}}$ )

## F ADDITIONAL RESULTS OF PLASTICITY RULE

### F.1 CONSTRAINT ENFORCEMENT DYNAMICS

To analyze the functionality of the constraints, we tracked the enforcement dynamics for the three representative rules highlighted with color in Table 1 and mentioned in Fig. 6. We observed significant differences in how distinct plasticity rules interact with these boundaries. Fig. S8a shows that the best performing rule actively engages the constraints, with approximately 15% of synapses frequently hitting the hard bounds or Dale’s law limits during training. In contrast, other rules (Fig. S8b and S8c) remain almost entirely within the permissible range. Importantly, our evolutionary optimization process does not penalize boundary contact; rather, we view these constraints as integral components of the synaptic dynamics. From an evolutionary perspective, the existence of these hard bounds serves as a stabilizing scaffold, allowing the search algorithm to explore more complex plasticity profiles that drive rapid learning. Without these bounds, such rules would very likely lead to catastrophic weight explosion or sign reversal, especially in the early stages when the parameters are not fully tuned.

### F.2 DISTRIBUTION OF DISCOVERED PLASTICITY RULES

As shown in Table S4, we identified and filtered 70 candidate plasticity rules from the Pareto-optimal population from the last generation based on overall task performance and biological validity criteria. The prevalent mathematical formulations were ranked and selected according to their ratio of occurrence within the filtered population. Fig. S9 illustrates the visualization of synapse-type-specific coefficients for representative plasticity rules from the filtered rule population in Table S4. Empty rows indicate that the corresponding term is absent from all rules in the filtered population. Each polar plot shows the coefficient distribution of one plasticity candidate term. Panels (a-d) display coefficient distributions for synapse-type-specific plasticity terms that depend on both presynaptic and postsynaptic neuron types (e.g.,  $S_{\text{pre}} \cdot S_{\text{post}}$  or  $X_{\text{pre}} \cdot X_{\text{post}}$ ), organized by connection class: (a) excitatory-to-excitatory, (b) excitatory-to-inhibitory, (c) inhibitory-to-excitatory, and (d) inhibitory-to-inhibitory connections. Panel (e) shows coefficient distributions for neuron-type-dependent terms that depend only on either presynaptic or postsynaptic activity (e.g.,  $S_{\text{pre}}$  or  $X_{\text{post}}$ ), which are shared across all types of connections.

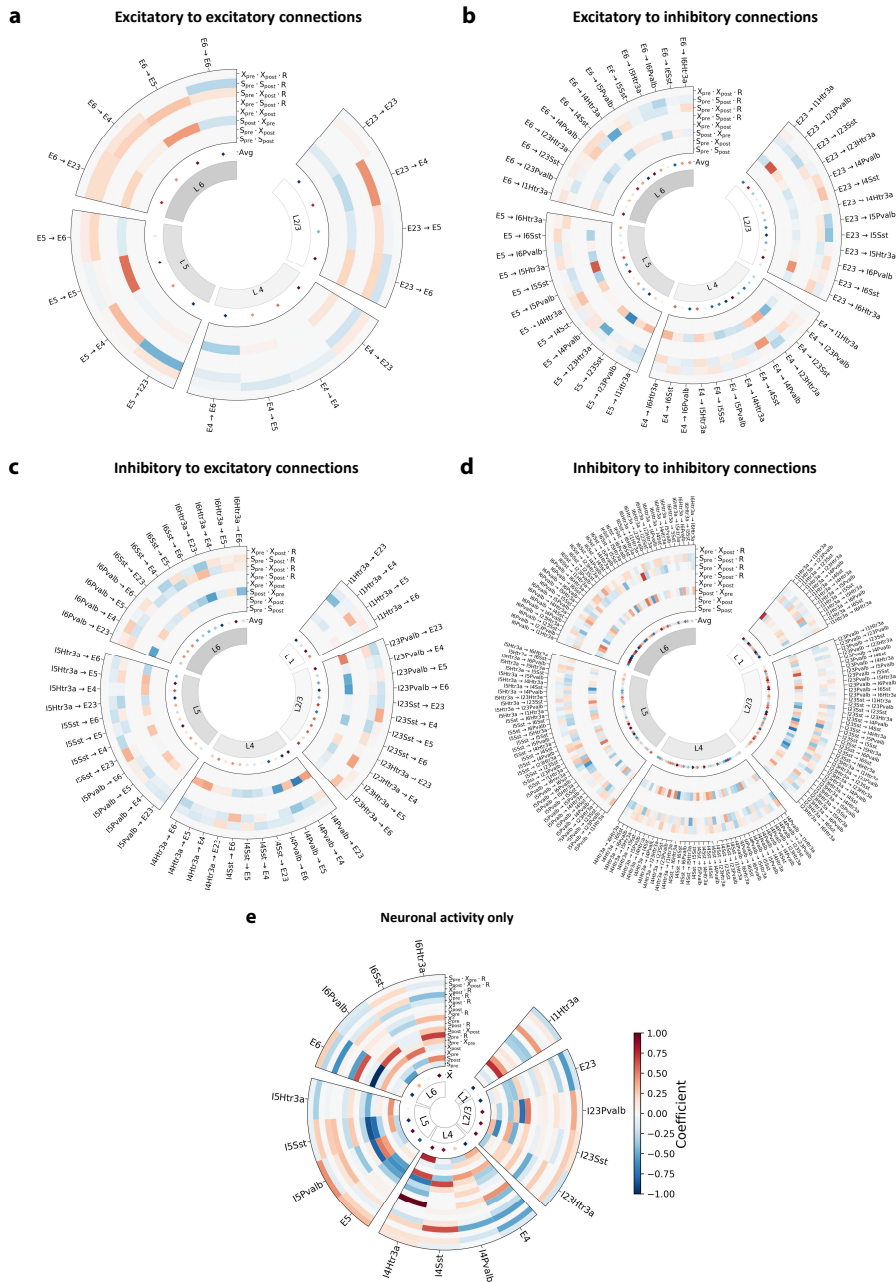

Figure S9: Illustration of how different rules from the filtered population as shown in Table S4 distribute their plasticity coefficients across the 25 plasticity candidate terms shown in Sec. D.1.

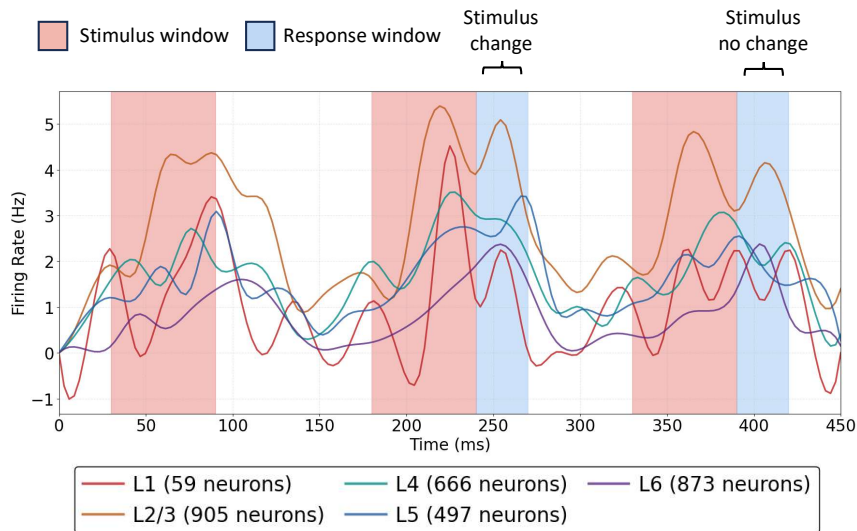

Figure S10: Visualization of cortical layer-specific firing rate dynamics during the test phase, optimized using the overall best-performing plasticity rule identified from the filtered rule population (form:  $\Delta w = X_{\text{post}} + S_{\text{pre}} \cdot X_{\text{pre}} + S_{\text{post}} \cdot X_{\text{pre}} + X_{\text{post}}^2 + X_{\text{post}} \cdot R$ ).

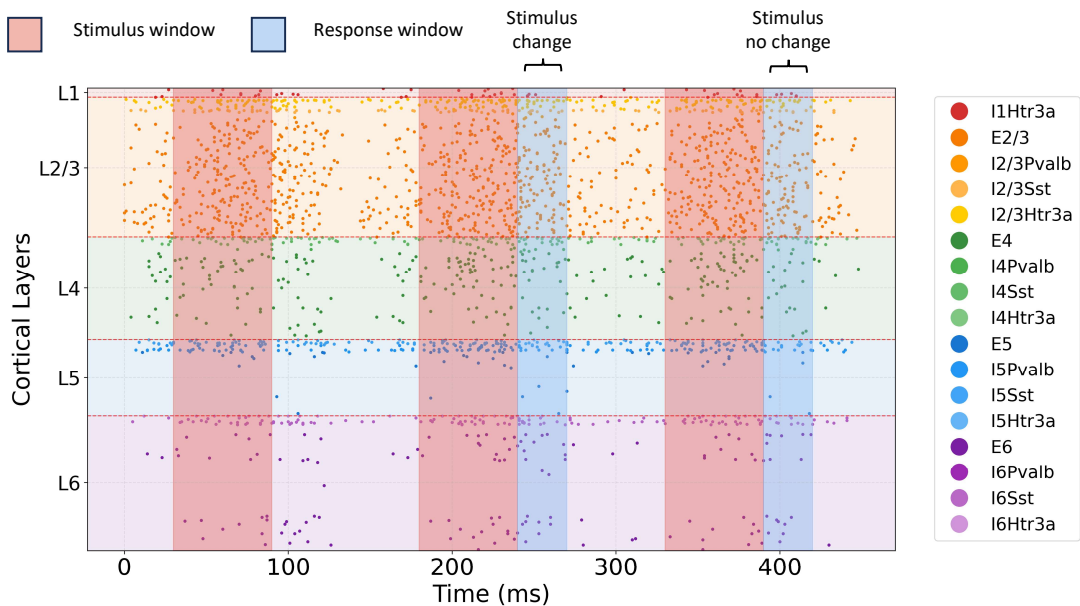

Figure S11: Spike raster plot during the test phase, optimized using a *reward-free* plasticity rule with high performance identified from the filtered rule population (form:  $\Delta w = S_{\text{pre}}$ ).

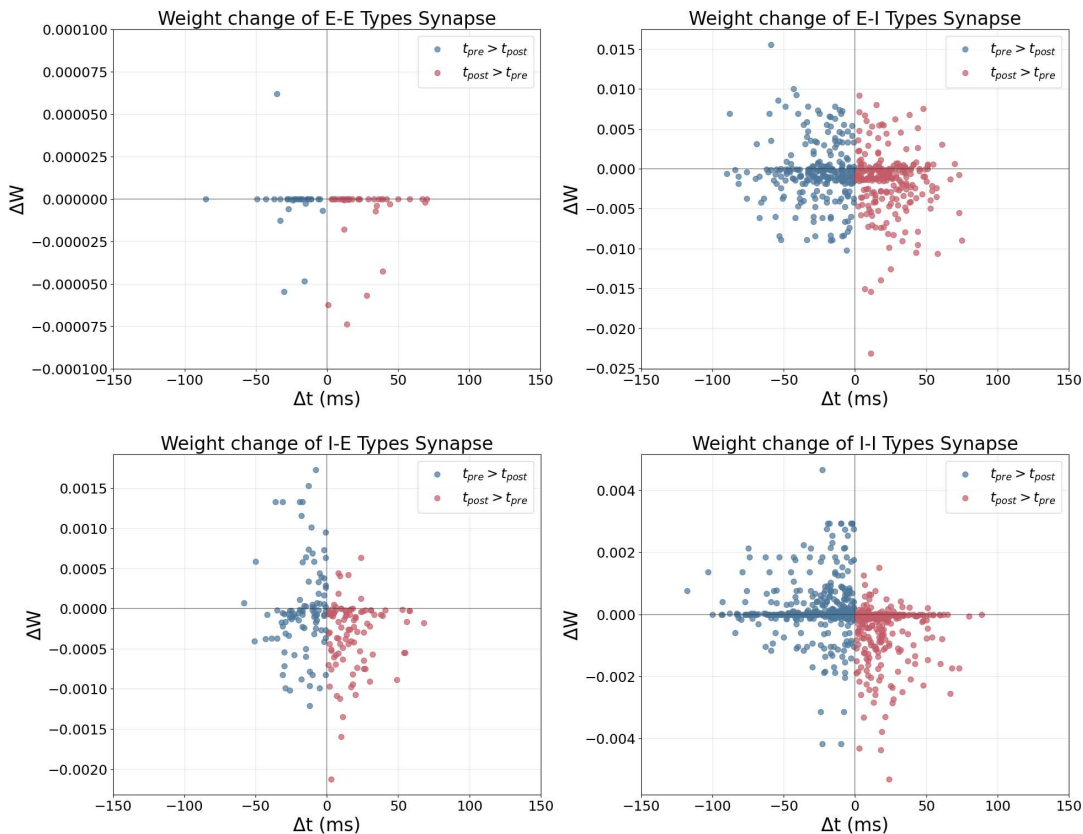

Figure S12: Visualization of the overall best-performing plasticity rule.

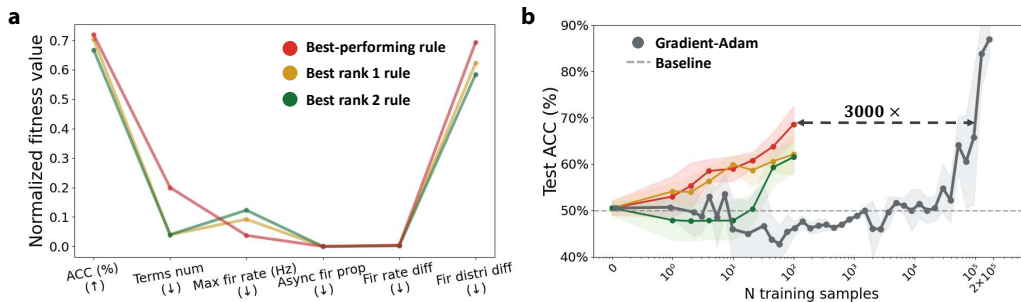

Figure S13: Comparison of performance on visual change detection of *natural images* between three representative rules and the widely used gradient-based Adam optimizer. **a.** Performance overview. **b.** Mean test accuracy over 5 seeds (200 test trials each); shaded areas indicate standard deviation.

| Rank | Mathematical formulation of plasticity rules in filtered population                                              | Ratio  | Obj-1 ( $\uparrow$ ) |       | Obj-2 ( $\downarrow$ ) |      | Obj-3 ( $\downarrow$ ) |        | Obj-4 ( $\downarrow$ ) |      | Obj-5 ( $\downarrow$ ) |      | Obj-6 ( $\downarrow$ ) |      |
|------|------------------------------------------------------------------------------------------------------------------|--------|----------------------|-------|------------------------|------|------------------------|--------|------------------------|------|------------------------|------|------------------------|------|
|      |                                                                                                                  |        | Avg                  | Best  | Avg                    | Best | Avg                    | Best   | Avg                    | Best | Avg                    | Best | Avg                    | Best |
| 1    | $\Delta w = S_{pre}$                                                                                             | 46.67% | 65.19                | 70.29 | 0.04                   | 0.04 | 156.99                 | 127.83 | 0.00                   | 0.00 | 1.25                   | 0.86 | 0.83                   | 0.71 |
| 2    | $\Delta w = S_{pre} \cdot X_{post}$                                                                              | 10.67% | 63.91                | 68.43 | 0.04                   | 0.04 | 165.88                 | 125.96 | 0.00                   | 0.00 | 1.14                   | 0.87 | 0.92                   | 0.86 |
| 3    | $\Delta w = X_{pre} \cdot R$                                                                                     | 5.33%  | 61.57                | 64.64 | 0.04                   | 0.04 | 162.09                 | 133.94 | 0.02                   | 0.00 | 5.39                   | 1.06 | 0.87                   | 0.78 |
| 4    | $\Delta w = S_{post} \cdot X_{pre}$                                                                              | 5.33%  | 62.50                | 63.21 | 0.04                   | 0.04 | 170.62                 | 137.43 | 0.00                   | 0.00 | 1.04                   | 0.84 | 0.91                   | 0.85 |
| 5    | $\Delta w = S_{post}$                                                                                            | 4.00%  | 61.95                | 63.57 | 0.04                   | 0.04 | 191.33                 | 183.74 | 0.00                   | 0.00 | 0.85                   | 0.75 | 1.03                   | 0.99 |
| 6    | $\Delta w = S_{pre} \cdot X_{pre}$                                                                               | 4.00%  | 65.65                | 67.07 | 0.04                   | 0.04 | 167.58                 | 149.37 | 0.00                   | 0.00 | 1.06                   | 0.76 | 0.85                   | 0.84 |
| 7    | $\Delta w = S_{pre} + S_{pre} \cdot X_{post}$                                                                    | 2.67%  | 69.79                | 69.86 | 0.08                   | 0.08 | 175.01                 | 168.95 | 0.00                   | 0.00 | 1.33                   | 1.18 | 0.73                   | 0.62 |
| 8    | $\Delta w = S_{pre} + S_{pre} \cdot X_{pre}$                                                                     | 2.67%  | 65.89                | 67.36 | 0.08                   | 0.08 | 137.04                 | 133.72 | 0.00                   | 0.00 | 1.36                   | 1.20 | 0.88                   | 0.86 |
| 9    | $\Delta w = S_{post} \cdot X_{post}$                                                                             | 2.67%  | 62.36                | 62.79 | 0.04                   | 0.04 | 190.78                 | 187.54 | 0.00                   | 0.00 | 0.97                   | 0.73 | 1.05                   | 1.05 |
| 10   | $\Delta w = X_{post} + S_{pre} \cdot X_{pre} + S_{post} \cdot X_{pre} + X_{post}^2 + X_{post} \cdot R$           | 1.33%  | 71.86                | 71.86 | 0.20                   | 0.20 | 115.63                 | 115.63 | 0.00                   | 0.00 | 1.76                   | 1.76 | 0.98                   | 0.98 |
| 11   | $\Delta w = S_{pre} + S_{pre} \cdot X_{post} + S_{pre} \cdot X_{post} \cdot R + S_{post} \cdot X_{post} \cdot R$ | 1.33%  | 60.21                | 60.21 | 0.16                   | 0.16 | 138.89                 | 138.89 | 0.00                   | 0.00 | 1.03                   | 1.03 | 0.79                   | 0.79 |
| 12   | $\Delta w = S_{pre} \cdot X_{post} + S_{pre} \cdot X_{post} \cdot R$                                             | 1.33%  | 61.07                | 61.07 | 0.08                   | 0.08 | 119.51                 | 119.51 | 0.00                   | 0.00 | 1.21                   | 1.21 | 0.92                   | 0.92 |
| 13   | $\Delta w = S_{post} + S_{post} \cdot X_{post} \cdot R$                                                          | 1.33%  | 66.57                | 66.57 | 0.08                   | 0.08 | 130.64                 | 130.64 | 0.00                   | 0.00 | 1.36                   | 1.36 | 0.90                   | 0.90 |
| 14   | $\Delta w = S_{pre} + S_{pre} \cdot X_{post} + S_{pre} \cdot X_{pre} \cdot R$                                    | 1.33%  | 65.93                | 65.93 | 0.12                   | 0.12 | 126.65                 | 126.65 | 0.00                   | 0.00 | 1.33                   | 1.33 | 0.78                   | 0.78 |
| 15   | $\Delta w = X_{post}$                                                                                            | 1.33%  | 62.36                | 62.36 | 0.04                   | 0.04 | 182.80                 | 182.80 | 0.00                   | 0.00 | 0.87                   | 0.87 | 1.06                   | 1.06 |
| 16   | $\Delta w = S_{post} \cdot R$                                                                                    | 1.33%  | 60.71                | 60.71 | 0.04                   | 0.04 | 132.30                 | 132.30 | 0.00                   | 0.00 | 1.25                   | 1.25 | 0.83                   | 0.83 |
| 17   | $\Delta w = S_{pre} + S_{pre} \cdot X_{post} \cdot R$                                                            | 1.33%  | 66.29                | 66.29 | 0.08                   | 0.08 | 162.30                 | 162.30 | 0.00                   | 0.00 | 0.97                   | 0.97 | 0.80                   | 0.80 |
| 18   | $\Delta w = S_{pre} \cdot X_{post} + S_{post} \cdot X_{post}$                                                    | 1.33%  | 63.58                | 63.58 | 0.08                   | 0.08 | 131.29                 | 131.29 | 0.00                   | 0.00 | 1.35                   | 1.35 | 0.94                   | 0.94 |
| 19   | $\Delta w = S_{pre} + X_{pre}^2 \cdot R$                                                                         | 1.33%  | 67.29                | 67.29 | 0.08                   | 0.08 | 150.14                 | 150.14 | 0.00                   | 0.00 | 1.15                   | 1.15 | 0.85                   | 0.85 |
| 20   | $\Delta w = S_{pre} + S_{post} \cdot X_{post} \cdot R$                                                           | 1.33%  | 66.21                | 66.21 | 0.08                   | 0.08 | 156.19                 | 156.19 | 0.00                   | 0.00 | 1.09                   | 1.09 | 0.82                   | 0.82 |
| 21   | $\Delta w = S_{pre} + S_{pre} \cdot X_{pre} + S_{pre} \cdot X_{pre} \cdot R$                                     | 1.33%  | 67.43                | 67.43 | 0.12                   | 0.12 | 155.35                 | 155.35 | 0.00                   | 0.00 | 1.11                   | 1.11 | 0.84                   | 0.84 |

Table S4: Mathematical formulations of all plasticity rules ranked by ratio of occurrence in the *filtered Pareto-optimal population* and their average performance on six objectives. Each formulation may contain multiple rules with identical mathematical form but varying hyperparameters. *Avg*: average fitness across individuals within each formulation; *Best*: optimal fitness within each formulation.

### F.3 LAYER-WISE FIRING RATE DYNAMICS

Fig. S10 complements Fig. 5a by visualizing the layer-specific average firing rate dynamics during the test phase, optimized using the overall best-performing plasticity rule identified from the filtered rule population. The result demonstrates that the optimized V1 model effectively sustains persistent activity across all cortical layers during the delay period.

### F.4 REWARD-FREE PLASTICITY RULE DYNAMICS

Fig. S11 also complements Fig. 5a by visualizing the spike raster plot of V1 model optimized using a *reward-free* plasticity rule with high performance identified from the filtered rule population. The result demonstrates that even without reward modulation, the optimized V1 model can still maintain stable firing dynamics during the test phase. Especially, different types of neurons exhibit diverse firing patterns during the stimulus presentation, delay periods and response windows.

### F.5 SYNAPTIC WEIGHT CHANGES OF THE OVERALL BEST-PERFORMING RULE

Fig. S12 illustrates the synaptic weight changes induced by the discovered overall best-performing plasticity rule,  $\Delta w = X_{post} + S_{pre} \cdot X_{pre} + S_{post} \cdot X_{pre} + X_{post}^2 + X_{post} \cdot R$ , across coarser-grain categories of synaptic connections: excitatory-to-excitatory, excitatory-to-inhibitory, inhibitory-to-excitatory, and inhibitory-to-inhibitory.

### F.6 COMPARISON WITH GRADIENT-BASED OPTIMIZATION ON NATURAL IMAGES

Fig. S13 illustrates the performance comparison between three representative plasticity rules as defined in Sec. 3.3 in the main manuscript and the gradient-based Adam optimizer on a visual change detection task with natural images. For clarity, we briefly restate the definitions of the three selected rules: (i) the overall best-performing rule with formulation  $\Delta w = X_{post} + S_{pre} \cdot X_{pre} + S_{post} \cdot X_{pre} + X_{post}^2 + X_{post} \cdot R$ , (ii) the best rank-1 rule, defined as the optimal performer within the  $\Delta w = S_{pre}$  class, and (iii) the best rank-2 rule, representing the top performer in the  $\Delta w = S_{pre} \cdot X_{post}$  category.

### F.7 LONG TIME HORIZON TRAINING AND HOMEOSTATIC PROPERTY

To further characterize the stability properties of the discovered plasticity mechanisms, we evaluated the overall best-performing rule,  $\Delta w = X_{post} + S_{pre} \cdot X_{pre} + S_{post} \cdot X_{pre} + X_{post}^2 + X_{post} \cdot R$ , under extended training regimes beyond its evolutionary setting. As shown in Fig. S15, although the overall best-performing rule was evolved under a 100 training trials’ setting, it exhibits consistent performance stabilization when exposed to orders of more training samples. This sustained adaptability suggests that the discovered plasticity mechanism possesses intrinsic self-regulatory dynamics that prevent performance degradation during continued fine-tuning, analogous to homeostatic plasticity observed in biological neural circuits.

However, we need to acknowledge that this robustness is non-trivial and not representative of the entire filtered explored rule population. The majority of evolved rules exhibit performance degradation under prolonged exposure to stimuli. This fragility is especially evident in reward-free plasticity rules, where the lack of modulatory feedback renders the network prone to unbounded synaptic drift and functional collapse outside the evolutionary setting.

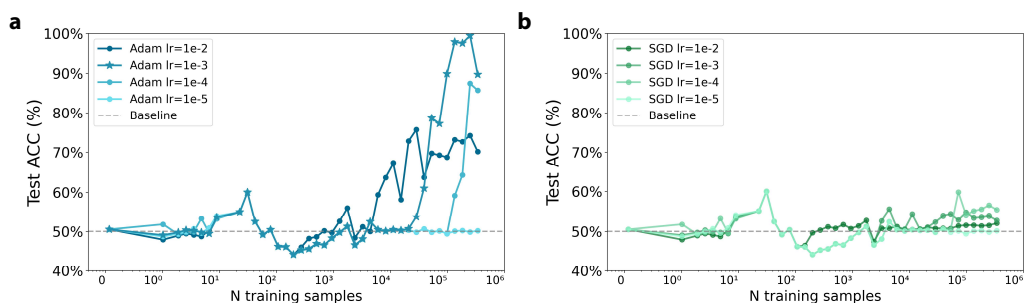

Figure S14: Sensitivity analysis training V1 model on visual change detection on natural images via Adam and SGD with different *learning rates*. The best performance is achieved using Adam with a learning rate of  $10^{-3}$ , which is highlighted with  $\star$  marker. **a.** Adam optimizer. **b.** SGD optimizer.

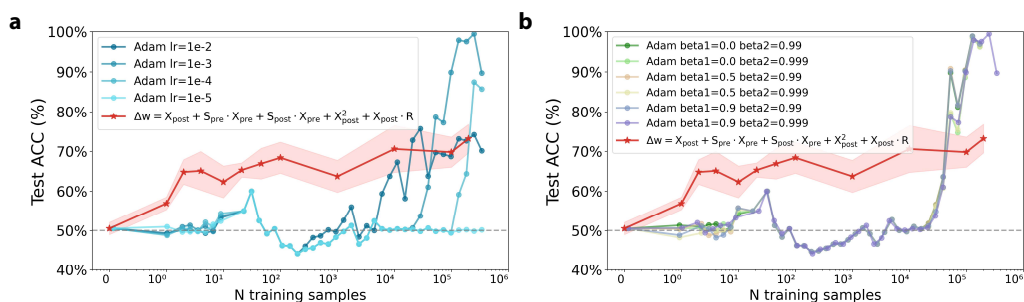

Figure S15: **a.** Task performance dynamics of the explored overall best-performing plasticity rule with sufficient training samples on visual change detection on natural images. **b.** Sensitivity analysis of the Adam optimizer’s performance on visual change detection on natural images with respect to the  $\beta_1$  and  $\beta_2$  momentum hyperparameters. The learning rate is fixed at  $10^{-3}$ . Each data point shows the test accuracy averaged over its 50 nearest neighbors to mitigate sampling variability. The overall best-performing synaptic plasticity rule is also provided for reference, marked with  $\star$ .

## G GRADIENT DESCENT SETTINGS AND SENSITIVITY ANALYSIS

### G.1 DETAILED GRADIENT BASED OPTIMIZATION SETTINGS

For the gradient-based results in the main manuscript, networks were trained using the Adam optimizer with a learning rate of 0.001 and default values for all other hyperparameters. This setting was chosen based on a sensitivity analysis in Sec. G.2.

To enable gradient flow through spiking neurons, a Gaussian surrogate gradient was implemented following Chen et al. (2022). The surrogate gradient was parameterized with a fixed standard deviation  $\sigma = 0.5$  and amplitude = 0.3, applied to the scaled membrane potential. These parameters were not updated during training. Backpropagation through time (BPTT) was used for credit assignment across temporal sequences. This setup ensures a direct comparison between gradient-based optimization and the explored plasticity rules, while accounting for the additional computational cost introduced by surrogate gradients and BPTT.

## G.2 SENSITIVITY ANALYSIS IN HYPERPARAMETERS OF OPTIMIZERS

In Fig. S14a, we present the results of training the V1 model on the visual change detection task with natural images using the Adam optimizer across a range of learning rates:  $\{10^{-5}, 10^{-4}, 10^{-3}, 10^{-2}\}$ . The analysis reveals that the V1 model is highly sensitive to optimizer choice, where the model achieves peak performance with a learning rate of  $10^{-3}$ , while other rates degrade convergence. We also evaluated SGD with the same set of learning rates for comparison in Fig. S14b. However, SGD fails to converge effectively across all tested learning rates within the same training budget.

We extended our analysis to the sensitivity of Adam’s momentum hyperparameters,  $\beta_1$  and  $\beta_2$ , with the learning rate fixed at previously identified optimal value,  $10^{-3}$ . As shown in Fig. S15b, performance remains stable across  $\beta_1 \in \{0, 0.5, 0.9\}$  and  $\beta_2 \in \{0.99, 0.999\}$ . This relative insensitivity to  $\beta$  parameters reinforces our conclusion that evolved plasticity rules achieve behavioral performance with order-of-magnitude greater efficiency than gradient-based methods.

## H DETAILS OF MULTI-OBJECTIVE EVOLUTIONARY FRAMEWORK

As outlined in Section 2, the discovery of plasticity mechanisms can be cast as a multi-objective search problem. Each candidate corresponds to a parameterized plasticity rule, and the goal is to identify rules that strike a balance between predictive performance, biological plausibility, and computational efficiency. This search problem presents several key challenges:

**Expensive evaluation.** Evaluating the quality of a plasticity rule requires training a new V1 network from scratch under the candidate rule. This involves long simulation times and limits the number of rules that can be explored within practical runtime.

**Many objectives.** The optimization is multi-objective, combining quantitative performance (*e.g.*, task accuracy, number of terms) with qualitative desiderata. Some objectives are *soft-bounded*: for instance, it is desirable for the learned plasticity rule to exhibit dynamics similar to biological systems, but perfect matching is neither required nor expected. This leaves room for approximate but functionally relevant behaviors.

**High-dimensional search space.** The plasticity rule is defined over multiple interacting components. This leads to a large combinatorial search space with complex dependencies.

**Noisy evaluation.** Because a plasticity rule must be assessed by training a network from scratch on varying data, its measured performance inevitably exhibits a substantial degree of randomness. As a result, evaluations of the same rule can differ across runs. An effective search framework must therefore be robust to this variability, avoiding misleading selections and favoring rules that demonstrate consistently strong performance.

**Non-differentiable optimization.** The objective functions do not admit closed-form gradients with respect to the rule parameters. This rules out traditional gradient-based optimization and motivates the use of derivative-free search.

Taken together, these factors make the search for plasticity mechanisms especially demanding. To address them, we employ an evolutionary framework, which is well suited to handling non-differentiability, noise, and multiple objectives while naturally supporting parallel and scalable evaluation. The following section details the specific evolutionary algorithm used in our study.

### H.1 PROPOSED EVOLUTIONARY FRAMEWORK

To address the challenges outlined above, we propose a tailored evolutionary framework for plasticity rule discovery. Our method builds on established multi-objective evolutionary algorithms (MOEAs) and is implemented within the EvoX framework (Huang et al., 2024a).

The algorithm is designed to be robust to noise, scalable to large populations, and efficient on modern GPU clusters through parallel evaluation. Its workflow follows four main phases: *initialization*, *reproduction*, *evaluation* (including re-evaluation), and *selection*, as summarized in Algorithm 1.

During *initialization*, a population of candidate rules is randomly sampled from the parameter space. In each generation, *reproduction* produces offspring via swarm-inspired updates followed by mutation. *Evaluation* then proceeds on the offspring and on a dynamically selected subset of the current population for re-evaluation (*i.e.*, individuals with few prior evaluations). This adaptive re-evaluation saves computational budget early while preserving the ability to reliably discriminate between similarly performing solutions in later stages through multiple rounds of evaluation. Finally, *selection* ranks all evaluated solutions using a noise-aware non-dominated sorting procedure and retains the most promising candidates for the next generation.

**Algorithm 1** Noise-Aware Multi-Objective Evolutionary Framework

---

```

1: Initialize population  $P$  with random candidates
2: Initialize evaluation statistics (counts, means, variances)
3: while termination criteria not met do
4:   Offspring  $\leftarrow$  REPRODUCTION( $P$ ) ▷ Sec. H.1.1
5:    $\mathcal{R} \leftarrow$  select subset of  $P$  with lowest evaluation counts for re-evaluation ▷ Sec. H.1.3
6:   Evaluate Offspring  $\cup \mathcal{R}$  in parallel ▷ Sec. H.1.3
7:   Update evaluation statistics
8:    $P \leftarrow$  SELECTION( $P$ , Offspring,  $\mathcal{R}$ ) ▷ Sec. H.1.2
9: end while
10: return Final non-dominated set from  $P$ 

```

---

## H.1.1 REPRODUCTION OPERATOR

The reproduction operator follows a Competitive Swarm Optimizer (CSO)–style mechanism adapted from TensorRVEA (Cheng & Jin, 2015; Liang et al., 2024). The population is randomly partitioned into  $N/2$  disjoint pairs. For each pair, a *teacher* (winner) and a *student* (loser) are identified by comparing their performance on a randomly sampled objective, where the objective index is drawn according to a predefined weight distribution. *Only the student* updates its velocity and position by combining directional cues from the teacher and the population center; the teacher remains stationary in this phase. To produce a full set of  $N$  offspring per generation, *both* members of the pair then undergo mutation: one offspring is generated from the updated student, and a second offspring is generated from the teacher.

This CSO-style pairing and update are well suited to GPU acceleration: pair formation, pair-wise comparison, per-dimension velocity updates, and independent mutations can be executed in parallel without data dependencies (the population center is a single reduction).

## H.1.2 SELECTION OPERATOR

The selection phase accounts for noisy evaluations by incorporating statistical confidence into the dominance relation used in non-dominated sorting (Deb et al., 2002) while following the general principle of dealing with noisy data in evolutionary algorithm (Jin & Branke, 2005; Fieldsend & Everson, 2005). Each solution maintains online estimates of the mean and variance of its objectives, updated via Welford’s method. Rather than applying deterministic dominance, solutions are compared probabilistically, the algorithm estimates the probability that one solution outperforms another using their means and variances.

Formally, for each objective, a win-rate probability is computed between two solutions. A solution is said to dominate another only if it achieves a sufficiently high probability (*e.g.*,  $> 55\%$ ) of being better on *all* objectives. This definition naturally adapts to noise: under high variance, dominance requires a clear margin of superiority, while under low variance, even small improvements can suffice. In this way, the selection pressure adjusts automatically to evaluation reliability.

These probabilistic dominance relations are used to construct a dominance matrix, which forms the basis for a confidence-aware non-dominated sorting procedure. After sorting, ties near the population cutoff are broken using a diversity measure (crowding distance) adjusted with an uncertainty penalty, favoring solutions that are both diverse and reliably evaluated.

This procedure reduces bias from noisy evaluations, improving stability in stochastic environments and enabling reliable optimization when evaluations are expensive and uncertain. The overall process is summarized in Algorithm 3.

**Algorithm 2** Reproduction( $P, \{\mathbf{v}_i\}, \phi$ )

- 
- 1: **Input:** Population  $P = \{\mathbf{x}_i\}_{i=1}^N$ , velocities  $\{\mathbf{v}_i\}_{i=1}^N$ , convergence parameter  $\phi$ , objective weights  $\mathbf{w} \in \mathbb{R}^m$
  - 2: **Output:** Offspring set  $P' = \{\mathbf{x}'_i\}_{i=1}^N$  and offspring velocities  $\{\mathbf{v}'_i\}_{i=1}^N$
  - 3: Randomly shuffle indices and form  $N/2$  disjoint pairs
  - 4: Compute population center  $\mathbf{c} \leftarrow \frac{1}{N} \sum_{i=1}^N \mathbf{x}_i$  (parallel reduction)
  - 5: **for** each pair  $(i, j)$  **in parallel do**
  - 6:   Sample objective  $k \sim \text{Categorical}(\mathbf{w})$
  - 7:   Determine teacher/student by objective-wise comparison (assume minimization):  
       if  $f_k(\mathbf{x}_i) \leq f_k(\mathbf{x}_j) : t \leftarrow i, s \leftarrow j$  else  $t \leftarrow j, s \leftarrow i$
  - 8:   Sample elementwise coefficients  $\lambda_1, \lambda_2, \lambda_3 \sim \mathcal{U}[0, 1]^d$
  - 9:   **Student update (only):**  
       
$$\mathbf{v}_s \leftarrow \lambda_1 \odot \mathbf{v}_s + \lambda_2 \odot (\mathbf{x}_t - \mathbf{x}_s) + \lambda_3 \odot \phi \odot (\mathbf{c} - \mathbf{x}_s)$$
       
$$\tilde{\mathbf{x}}_s \leftarrow \mathbf{x}_s + \mathbf{v}_s$$
  - 10:   **Mutation (both members produce offspring):**  
        $\mathbf{x}'_s \leftarrow \text{MUTATE}(\tilde{\mathbf{x}}_s)$  (continuous: polynomial; gating: discrete/bit-flip; dimension-aware rates)  
        $\mathbf{x}'_t \leftarrow \text{MUTATE}(\mathbf{x}_t)$  (teacher does not move before mutation)
  - 11:   Set offspring velocities:  $\mathbf{v}'_s \leftarrow \mathbf{v}_s$  (updated),  $\mathbf{v}'_t \leftarrow \mathbf{v}_t$  (unchanged)
  - 12:   Add  $\mathbf{x}'_s, \mathbf{x}'_t$  (and  $\mathbf{v}'_s, \mathbf{v}'_t$ ) to  $P'$
  - 13: **end for**
  - 14: **return**  $P', \{\mathbf{v}'_i\}_{i=1}^N$
- 

## H.1.3 EFFICIENT EVALUATION

Evaluating a candidate plasticity rule is computationally demanding, as each evaluation requires training a V1 model from scratch. To make this feasible at scale, two key complementary strategies are explored: batched parallelism and an optimized forward pass enabled by the gradient-free setup. Together, these techniques substantially reduce computational and memory costs, making large-scale exploration of candidate rules tractable.

**Batched evaluation.** At each generation,  $P$  candidate rules are trained concurrently. State variables (membrane potentials, spikes, synaptic traces) are organized in a Structure-of-Arrays (SoA) layout, rather than an Array-of-Structures (AoS). This design improves coalesced memory access and GPU bandwidth utilization, allowing all candidate rules to advance in lockstep. Within a single device, data parallelism enables simultaneous processing of multiple candidates and mini-batches. The same principle extends across multiple devices or nodes, achieving near-linear scaling as computational resources increase.

**Optimized forward pass (Gradient-free setup).** Because the evolutionary search is gradient-free, no backpropagation-through-time is required (Werbos, 1990). This removes the need to store long sequences of activations, so memory usage depends only on the instantaneous network state rather than the simulation length. As a result, models can be trained over long horizons by the plasticity rules without the prohibitive costs of differentiable approaches. The gradient-free setup also aligns naturally with the event-driven nature of spiking models. In contrast to surrogate-gradient methods (Huh & Sejnowski, 2018; Zenke & Ganguli, 2018; Neftci et al., 2019b), spikes are treated directly as binary events, which can be stored and processed compactly. This representation reduces both memory bandwidth demands and computation relative

**Algorithm 3** Selection with Probabilistic Non-Dominated Sorting

- 
- 1: **Input:** Candidate set  $C$  (parents, offspring, re-evaluated), mean objectives  $\bar{\mathbf{f}}$ , variances  $\mathbf{s}^2$ , population size  $N$
  - 2: **Output:** Survivor set  $P$
  - 3: Update  $\bar{\mathbf{f}}$  and  $\mathbf{s}^2$  for all  $x \in C$  via online estimators
  - 4: **for** each pair  $(i, j)$  in  $C$  **do**
  - 5:     **for** each objective  $k$  **do**
  - 6:         Compute win probability:

$$\text{WinRate}_{ij}^{(k)} = \frac{1}{1 + \exp\left(-\frac{\bar{f}_j^{(k)} - \bar{f}_i^{(k)}}{\sqrt{s_i^{2(k)} + s_j^{2(k)} + \epsilon}}\right)}$$

- 7:     **end for**
- 8:      $i$  dominates  $j$  if  $\text{WinRate}_{ij}^{(k)} > \tau$  for all  $k$
- 9: **end for**
- 10: Build dominance matrix and perform non-dominated sorting
- 11: Break ties at cutoff using adjusted crowding distance:

$$\text{AdjDist}_i = \text{Crowding}_i - \kappa \cdot \frac{1}{m} \sum_{k=1}^m \frac{s_i^{2(k)}}{\max_j s_j^{2(k)}}$$

- 12: Select top  $N$  individuals as survivor set  $P$
- 

to floating-point operations. When combined with batched evaluation, these properties make forward-only simulation particularly efficient.

These efficiencies stem directly from the design of an evolutionary framework. Its gradient-free nature enables many techniques that avoid the heavy compute and memory demands of backpropagation, while its population-based structure inherently supports batching and large-scale parallelism. Taken together, these properties allow our system to sustain evaluation throughput on the order of  $10^5$  candidate plasticity rules per GPU per day, with each rule applied to training a V1 model of 3,000 neurons and approximately 400k parameters from scratch on two distinct tasks. This level of scalability enables exploration of vast rule spaces that would otherwise be computationally prohibitive.

## LARGE LANGUAGE MODEL USAGE DISCLOSURE

In accordance with the policy on LLM usage, we provide the following disclosure regarding how LLMs were employed during this work. LLMs were used only in supportive roles, with all substantive research contributions, coding, and writing decisions made by the human authors.

**Code base.** LLMs were used strictly for short code auto-completion, comparable to standard IDE assistance. All completions were reviewed and confirmed by the human authors. No unsupervised code generation, automatic project generation, or independent algorithm design was delegated to an LLM.

**Paper writing.** LLMs assisted only at the presentation level, *e.g.*, suggesting alternative phrasings or improving clarity of exposition. All scientific content, descriptions of methodology, results, and discussion were written and verified by the authors. All language suggestions from the LLM were reviewed by the authors.

**Research assistant.** LLMs were occasionally used as research assistants in a role analogous to a search engine. This included tasks such as quickly gathering related information or checking terminology. All final written content is based on references and verified sources; no scientific claims or results were drawn solely from LLM outputs.
